# Supplementary material for: Protein covariation networks for elucidating ferroptosis inducer mechanisms and potential synergistic drug targets
Source: Springer Nature journal article supplement (doi:10.1038/s42003-025-07886-3), 2025-03-31
Supplement: MOESM13 [file 42003_2025_7886_MOESM13_ESM.pdf]

## Reporting Summary

Nature Portfolio wishes to improve the reproducibility of the work that we publish. This form provides structure for consistency and transparency in reporting. For further information on Nature Portfolio policies, see our [Editorial Policies](#) and the [Editorial Policy Checklist](#).

### Statistics

For all statistical analyses, confirm that the following items are present in the figure legend, table legend, main text, or Methods section.

n/a Confirmed

- ☐ ☒ The exact sample size ( $n$ ) for each experimental group/condition, given as a discrete number and unit of measurement
- ☐ ☒ A statement on whether measurements were taken from distinct samples or whether the same sample was measured repeatedly
- ☐ ☒ The statistical test(s) used AND whether they are one- or two-sided  
*Only common tests should be described solely by name; describe more complex techniques in the Methods section.*
- ☒ ☐ A description of all covariates tested
- ☒ ☐ A description of any assumptions or corrections, such as tests of normality and adjustment for multiple comparisons
- ☐ ☒ A full description of the statistical parameters including central tendency (e.g. means) or other basic estimates (e.g. regression coefficient) AND variation (e.g. standard deviation) or associated estimates of uncertainty (e.g. confidence intervals)
- ☐ ☒ For null hypothesis testing, the test statistic (e.g.  $F$ ,  $t$ ,  $r$ ) with confidence intervals, effect sizes, degrees of freedom and  $P$  value noted  
*Give  $P$  values as exact values whenever suitable.*
- ☒ ☐ For Bayesian analysis, information on the choice of priors and Markov chain Monte Carlo settings
- ☒ ☐ For hierarchical and complex designs, identification of the appropriate level for tests and full reporting of outcomes
- ☐ ☒ Estimates of effect sizes (e.g. Cohen's  $d$ , Pearson's  $r$ ), indicating how they were calculated

*Our web collection on [statistics for biologists](#) contains articles on many of the points above.*

### Software and code

Policy information about [availability of computer code](#)

Data collection NIS-Elements ver 5.3 was used to obtain fluorescence images. Gen5 ver 3.09 was used for measuring CellTiter-Glo 2.0 Cell Viability Assay.

Data analysis R ver 4.2.1 and Rstudio version 2022.07.1+554 was used for data analysis.

For manuscripts utilizing custom algorithms or software that are central to the research but not yet described in published literature, software must be made available to editors and reviewers. We strongly encourage code deposition in a community repository (e.g. GitHub). See the Nature Portfolio [guidelines for submitting code & software](#) for further information.

### Data

Policy information about [availability of data](#)

All manuscripts must include a [data availability statement](#). This statement should provide the following information, where applicable:

- Accession codes, unique identifiers, or web links for publicly available datasets
- A description of any restrictions on data availability
- For clinical datasets or third party data, please ensure that the statement adheres to our [policy](#)

The dataset generated during and/or analyzed during the current study are available from the corresponding author on reasonable request.

## Research involving human participants, their data, or biological material

Policy information about studies with [human participants or human data](#). See also policy information about [sex, gender \(identity/presentation\), and sexual orientation](#) and [race, ethnicity and racism](#).

|                                                                    |                                |
|--------------------------------------------------------------------|--------------------------------|
| Reporting on sex and gender                                        | Not associated for this study. |
| Reporting on race, ethnicity, or other socially relevant groupings | Not associated for this study. |
| Population characteristics                                         | Not associated for this study. |
| Recruitment                                                        | Not associated for this study. |
| Ethics oversight                                                   | Not associated for this study. |

Note that full information on the approval of the study protocol must also be provided in the manuscript.

## Field-specific reporting

Please select the one below that is the best fit for your research. If you are not sure, read the appropriate sections before making your selection.

☒ Life sciences ☐ Behavioural & social sciences ☐ Ecological, evolutionary & environmental sciences

For a reference copy of the document with all sections, see [nature.com/documents/nr-reporting-summary-flat.pdf](https://www.nature.com/documents/nr-reporting-summary-flat.pdf)

## Life sciences study design

All studies must disclose on these points even when the disclosure is negative.

|                 |                                                                                                                                                                                                                                                                                                                                      |
|-----------------|--------------------------------------------------------------------------------------------------------------------------------------------------------------------------------------------------------------------------------------------------------------------------------------------------------------------------------------|
| Sample size     | For Western blotting and rt-PCR, the sample sizes were selected according to customary practices in the field, with a minimum of three independent biological replicates per condition. In constructing the covariation network through image analyses, we generally utilized datasets from more than 1,000 cells in each condition. |
| Data exclusions | Automatic image acquisition can occasionally produce images that are either unfocused or contain large fluorescent aggregates. Whenever the quantification data for a particular feature is significantly deviated, we reviewed the original images and excluded any outliers.                                                       |
| Replication     | Western blotting and rt-PCR analyses were replicated and all replication attempts were successful.                                                                                                                                                                                                                                   |
| Randomization   | To reduce arbitrariness, we automatically acquired cell images at nxn grid points per well, utilizing A1 confocal microscopy controlled by NIS-Elements software (Nikon).                                                                                                                                                            |
| Blinding        | In the PLOM-COM analysis, the target protein names were converted to numbers after sample preparation, and were converted back to their original names after creating the network. Additionally, the conditions names were kept confidential and were numerically coded during image acquisition and analysis.                       |

## Reporting for specific materials, systems and methods

We require information from authors about some types of materials, experimental systems and methods used in many studies. Here, indicate whether each material, system or method listed is relevant to your study. If you are not sure if a list item applies to your research, read the appropriate section before selecting a response.

### Materials & experimental systems

| n/a                                 | Involved in the study                                     |
|-------------------------------------|-----------------------------------------------------------|
| <input type="checkbox"/>            | <input checked="" type="checkbox"/> Antibodies            |
| <input type="checkbox"/>            | <input checked="" type="checkbox"/> Eukaryotic cell lines |
| <input checked="" type="checkbox"/> | <input type="checkbox"/> Palaeontology and archaeology    |
| <input checked="" type="checkbox"/> | <input type="checkbox"/> Animals and other organisms      |
| <input checked="" type="checkbox"/> | <input type="checkbox"/> Clinical data                    |
| <input checked="" type="checkbox"/> | <input type="checkbox"/> Dual use research of concern     |
| <input checked="" type="checkbox"/> | <input type="checkbox"/> Plants                           |

### Methods

| n/a                                 | Involved in the study                           |
|-------------------------------------|-------------------------------------------------|
| <input checked="" type="checkbox"/> | <input type="checkbox"/> ChIP-seq               |
| <input checked="" type="checkbox"/> | <input type="checkbox"/> Flow cytometry         |
| <input checked="" type="checkbox"/> | <input type="checkbox"/> MRI-based neuroimaging |

## Antibodies

### Antibodies used

SLC7A11, Invitrogen, Cat#PA5-116134  
 SLC3A2, Sigma, Cat#HPA017980  
 GPx4, abcam, Cat#ab125066, clone EPNCIR144  
 ATF4, CST, Cat#11815S, clone D4B8  
 HSPA5 (BiP, GRP78), abcam, Cat#ab21685  
 NRF2, MBL, Cat#M200-3, clone 1F2  
 AIFM2 (FSP1), Sigma, Cat#HPA028961  
 DHODH, Sigma, Cat#HPA010123  
 FATP2 (SLC27A2), Invitrogen, Cat#PA5-102343  
 TFR1, Invitrogen, Cat#13-6800, clone H68.4  
 HSPB1, e Bioscience, Cat#14-9112-80, clone STRSN  
 FT, Invitrogen, Cat#MA5-14736, clone 513C10  
 HIF1a, abcam, Cat#ab179483, clone EPR16897  
 NCOA4, Sigma, Cat#HPA051260  
 ATG7, abcam, Cat#ab201251, clone EP1759Y  
 HSP90α, Invitrogen, Cat#MA5-25036, clone OTI3B5  
 KEAP1, CST, Cat#8047, clone D6B12  
 HO-1, abcam, Cat#ab214643, clone EPR1390Y  
 NF2 (merlin), Sigma, Cat#HPA003097  
 LATS1, MyBioSource, Cat#MBS9610532  
 YAP1, CST, Cat#14729, clone D8H1X  
 LSH (HELLS), Sigma, Cat#HPA063242  
 EGLN1, Invitrogen, Cat#PA5-78511  
 4HNE, JaiCA, Cat#MHN-020P, clone HNE-J2  
 ACSL4, Invitrogen, Cat#PA5-100033  
 Myosin IIB, CST, Cat#8824, clone D8H8  
 Beta tubulin, SIGMA, Cat#T8328, clone AA2  
 pFAK, abcam, Cat#ab81298, clone EP2160Y  
 FAK, Invitrogen, Cat#39-6500, clone ZF002  
 LAMP2, Hybridoma Bank, Cat#H4B4-c (Clone ID)  
 mTOR, CST, Cat#2983, clone 7C10  
 pAKT, Merck, Cat#05-1003, clone 6F5  
 pRPS6, CST, Cat#4858, clone D57.2.2E  
 TFEB, CST, Cat#4240  
 GAPDH (for IF), abcam, Cat#ab83956  
 Alexa-488-anti-mouse IgG, molecular probes, Cat#A11029  
 Alexa-546-anti-mouse IgG, molecular probes, Cat#A11030  
 Anti-Chicken IgY, Cy5, abcam, Cat#ab97147  
 anti-Rabbit IgG, Alexa Fluor 488, abcam, Cat#ab150061  
 Anti-Mouse IgG, Alexa Fluor 647, abcam, Cat#ab150111  
 pSTAT3(Y705), CST, Cat#9145, clone D3A7  
 STAT3, CST, Cat#9139, clone 124H6  
 GAPDH (for WB), Millipore, Cat#MAB374, clone 6C5

### Validation

The antibodies used in this study have been validated by manufacturers, and the details are demonstrated on the product websites.

## Eukaryotic cell lines

Policy information about [cell lines and Sex and Gender in Research](#)

### Cell line source(s)

HEK293 cells and HeLa cells were obtained from an existing collection at the Kano Laboratory, Tokyo Institute of Technology. SW480 and HT29 cells were purchased from the American Type Culture Collection (Manassas, VA, USA), HCT-116 cells were obtained from the European Collection of Authenticated Cell Cultures (Porton Down, Salisbury, UK), and HT-1080 cells were acquired from the JCRB.

### Authentication

No authentication was performed by the authors of this manuscript.

### Mycoplasma contamination

Cell line was not tested for mycoplasma contamination but no indication of contamination was observed.

### Commonly misidentified lines (See [ICLAC](#) register)

No commonly misidentified lines are used.

## Plants

---

Seed stocks

N/A

Novel plant genotypes

N/A

Authentication

N/A
